# Supplementary material for: Placenta-derived gp96 as a multivalent prophylactic cancer vaccine
Source: PubMed Central journal article supplement — Sci Rep. 2013 Jun 6;3:1947. doi: 10.1038/srep01947 (PMC3674428; doi:10.1038/srep01947), 2013-06-06
Supplement: srep01947-s1.pdf [file srep01947-s1.pdf]

## Placenta-derived gp96 as a multivalent prophylactic cancer vaccine

Bao Zhao<sup>1,2,†</sup>, Yanzhong Wang<sup>1,†</sup>, Bo Wu<sup>1</sup>, Shan Liu<sup>3</sup>, Erjie Wu<sup>1</sup>, HongXia Fan<sup>1</sup>, MingMing Gui<sup>1</sup>, Lizhao Chen<sup>1</sup>, Changfei Li<sup>1</sup>, Ying Ju<sup>1</sup>, Wei Zhang<sup>3</sup>, Songdong Meng<sup>1,2,\*</sup>

1 CAS Key Laboratory of Pathogenic Microbiology and Immunology, Institute of Microbiology, Chinese Academy of Sciences (CAS), Beijing, China

2 School of Life Sciences, University of Science and Technology of China, Hefei, China

3 Detection Center of Tumor Biology, Cancer Institute & Hospital, Chinese Academy of Medical Sciences, Beijing, China

\* Corresponding author: Songdong Meng. CAS Key Laboratory of Pathogenic Microbiology and Immunology, Institute of Microbiology, CAS, No.1 West Beichen Road, Chaoyang District, Beijing 100101, P. R. China.

Tel: (86)-10-64807350; Fax: (86)-10-64807351.

E-mail: [mengsd@im.ac.cn](mailto:mengsd@im.ac.cn)

† These authors contributed equally to this work.

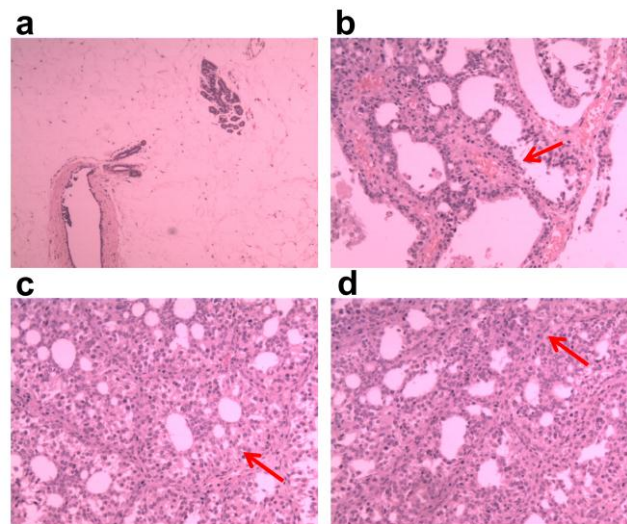

Supplementary Fig. S1 Mammary tumor histology. (a) Paraffin-embedded breast tissue sections from a P-gp96 immunized rat. (b-d) Paraffin-embedded breast tissue sections from unimmunized (PBS) rats. Intraductal proliferation (IDP) (b); ductal carcinoma *in situ* (DCIS) (c); and invasive ductal carcinoma (IDC) (d). Original magnification,  $\times 40$ .

Supplementary Table. S1. Characteristics of DMBA-induced mammary tumors in PBS- and P-gp96-immunized female Wistar rats.

| <b>Characteristic</b>           | <b>PBS (n=7)</b> | <b>P-gp96 (n=5)</b>            |
|---------------------------------|------------------|--------------------------------|
| Final body weight (g)           | 227 ±3.29        | 295 ±7.5                       |
| Tumor onset                     |                  |                                |
| Day of first tumor <sup>a</sup> | 91               | No tumors present <sup>c</sup> |
| Tumor incidence (%)             | 7/7 (100)        | 0/5 (0 <sup>c</sup> )          |
| Tumor volume (mm <sup>3</sup> ) | 6262.63 ±323.20  | 0 <sup>c</sup>                 |
| Mean tumor weight (g)           | 14.12            | 0 <sup>c</sup>                 |
| Multiplicity                    | 7.4 ±2.1         | 0 <sup>c</sup>                 |
| Total tumors <sup>b</sup>       | 52               | 0 <sup>c</sup>                 |
| IDP                             | 17               | 0                              |
| DCIS                            | 17               | 0                              |
| IDC                             | 18               | 0                              |

<sup>a</sup> Post-DMBA day at which the first mammary tumor was detectable by palpation. No tumors were detected in the gp96 immunized rats by the end of the experiment. <sup>b</sup> Number of total mammary tumors graded as IDP, DCIS, or IDC. <sup>c</sup> *P*<0.001.

Supplementary Table S2. Primers for Real-time PCR.

|               |                                                                   |
|---------------|-------------------------------------------------------------------|
| Mouse MUC1    | Forward: ATCGTCTATTTCCCTTGCCCTG<br>Reverse: TCCTACAAGTTGGCAGAAGTG |
| Mouse HER2    | Forward: CCCTCATCACCTACAACACAG<br>Reverse: CAGACCATAGCATACTCCAGC  |
| Mouse MMP2    | Forward: GTCTTCCCCTTCACTTTCCCTG<br>Reverse: CGGAAGTTCTTGGTGTAGGTG |
| Mouse FGF2    | Forward: GGAGTTGTGTCTATCAAGGGAG<br>Reverse: CAGTATGGCCTTCTGTCCAG  |
| Mouse c-Myc   | Forward: CTTTCCCTACCCGCTCAAC<br>Reverse: CTTCTCCACAGACACCACATC    |
| Mouse VEGF-a  | Forward: GAGAGCAGAAGTCCCATGAAG<br>Reverse: GCTTTGGTGAGGTTTGTATCC  |
| Mouse β-actin | Forward: ACCGTGAAAAGATGACCCAG<br>Reverse: GAGCATAGCCCTCGTAGATG    |

|                      |                                                                    |
|----------------------|--------------------------------------------------------------------|
| Mouse GAPDH          | Forward: AAATTCAACGGCACAGTCAAG<br>Reverse: GTTCACACCCATCACAAACATG  |
| Rat MUC1             | Forward: TGGCTTTGGTCATCGTCTATC<br>Reverse: CCTGTGCGAAACCTCTTCATAGG |
| Rat HER2             | Forward: TTTGGCACTGTCTACAAGGG<br>Reverse: ACACCAGCCATCACATACG      |
| Rat MMP2             | Forward: TGAGAAGGATGGCAAGTATGG<br>Reverse: TGTTGCCAGGAAAGTGAAG     |
| Rat FGF2             | Forward: TCTACTGCAAGAACGGCG<br>Reverse: TCGTTTCAGTGCCACATACC       |
| Rat c-Myc            | Forward: CTCGCGTTATTTGAAGCCTG<br>Reverse: CAACATAGGACGGAGAGCAG     |
| Rat VEGF-a           | Forward: GAGTACCCCGATGAGATAGAGT<br>Reverse: TTTGACCCTTTCCCTTTCCTC  |
| Rat $\beta$ -actin   | Forward: CAACTGGGACGATATGGAGAAG<br>Reverse: CAGAGGCATACAGGGACAAC   |
| Rat GAPDH            | Forward: ACAATGCCTGGATCCCTAAAG<br>Reverse: CACACCGACCTTCACCATC     |
| Human MUC1           | Forward: TGGTCTGTGTTCTGGTTGC<br>Reverse: CCCTACAAGTTGGCAGAAGTG     |
| Human HER2           | Forward: GAGACCCGCTGAACAATACC<br>Reverse: CTTACACATCGGAGAACAGGG    |
| Human MMP2           | Forward: GAGTTGGCAGTGCAATACCT<br>Reverse: GCCGTCCTTCTCAAAGTTGT     |
| Human FGF2           | Forward: CTGGCTATGAAGGAAGATGGA<br>Reverse: TGCCCAGTTCGTTTCAGTG     |
| Human c-Myc          | Forward: TCAAGAGGCGAACACACAAC<br>Reverse: GGCCTTTTCATTGTTTTCCA     |
| Human VEGF-a         | Forward: ATGACGAGGGCCTGGAGTGTG<br>Reverse: CCTATGTGCTGGCCTTGGTGAG  |
| Human $\beta$ -actin | Forward: GCACTCTTCCAGCCTTCC<br>Reverse: GTGATCTCCTTCTGCATCCTG      |
| Human GAPDH          | Forward: GTCCACTGGCGTCTTCAC<br>Reverse: GAGTCCTTCCACGATACCAAAG     |
